# Supplementary material for: Basophil-derived IL-6 regulates TH17 cell differentiation and CD4 T cell immunity
Source: PubMed Central journal article supplement (PMC5278410; doi:10.1038/srep41744), 2017-01-30
Supplement: srep41744-s1.pdf [file srep41744-s1.pdf]

**Supplemental Information**

**Basophil-derived IL-6 regulates T<sub>H</sub>17 cell differentiation and CD4 T cell immunity**

Chae Min Yuk, Hyeung Ju Park, Bo-In Kwon, Sang Joon Lah, Jun Chang, Ji-Young Kim, Kyung-Mi Lee, Su-Hyung Park, Seokchan Hong, and Seung-Hyo Lee

\*Correspondence and requests for reprints should be address to:

Seung-Hyo Lee, PhD

Cellular Immunology Laboratory, GSMSE, KAIST, Daejeon, 34141 Korea

Phone: 82-42-350-4235, Fax: 82-42-350-4240, E-mail: s1131345@kaist.ac.kr

or

Seokchan Hong, MD/PhD

Division of Rheumatology, University of Ulsan College of Medicine, Asan Medical Center, Seoul, 05505 Korea

Phone: 82-2-3010-1410, Fax: 82-2-3010-6969, E-mail: medivineluke@gmail.com

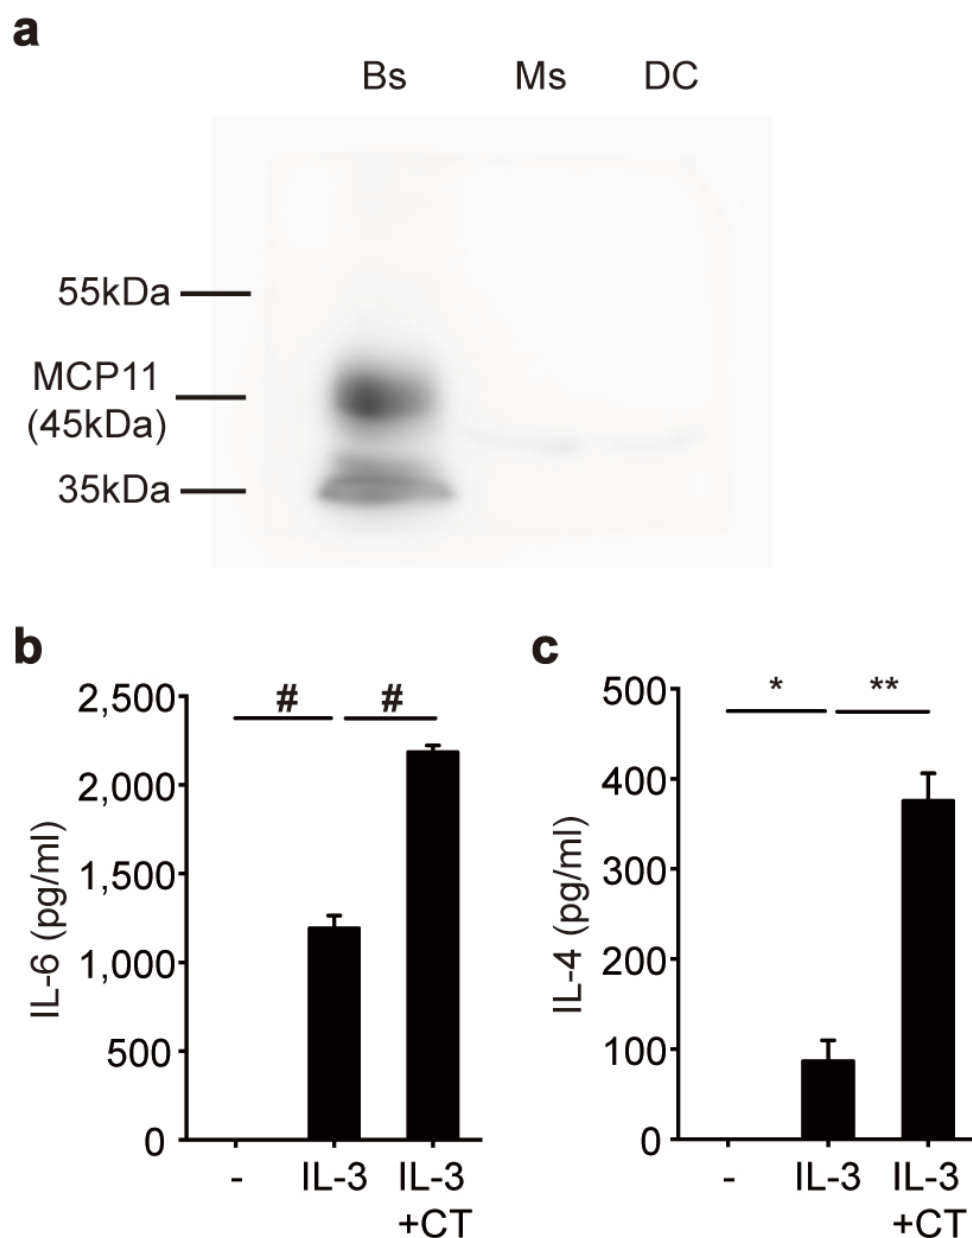

**Supplemental Figure S1. IL-6 and IL-4 production by SPBs stimulated with IL-3 or IL-3 plus CT.**

(a) Full-length blots of BMBs, BMBCs and BMDCs are presented for MCP-11 protein expression in Figure 1d. FACS-sorted YFP<sup>+</sup> SPBs were stimulated with IL-3 or IL-3 plus CT for 24 hours. Secretion of IL-6 (b) and IL-4 (c) was quantified. Data are representative of three independent experiments (n=3).

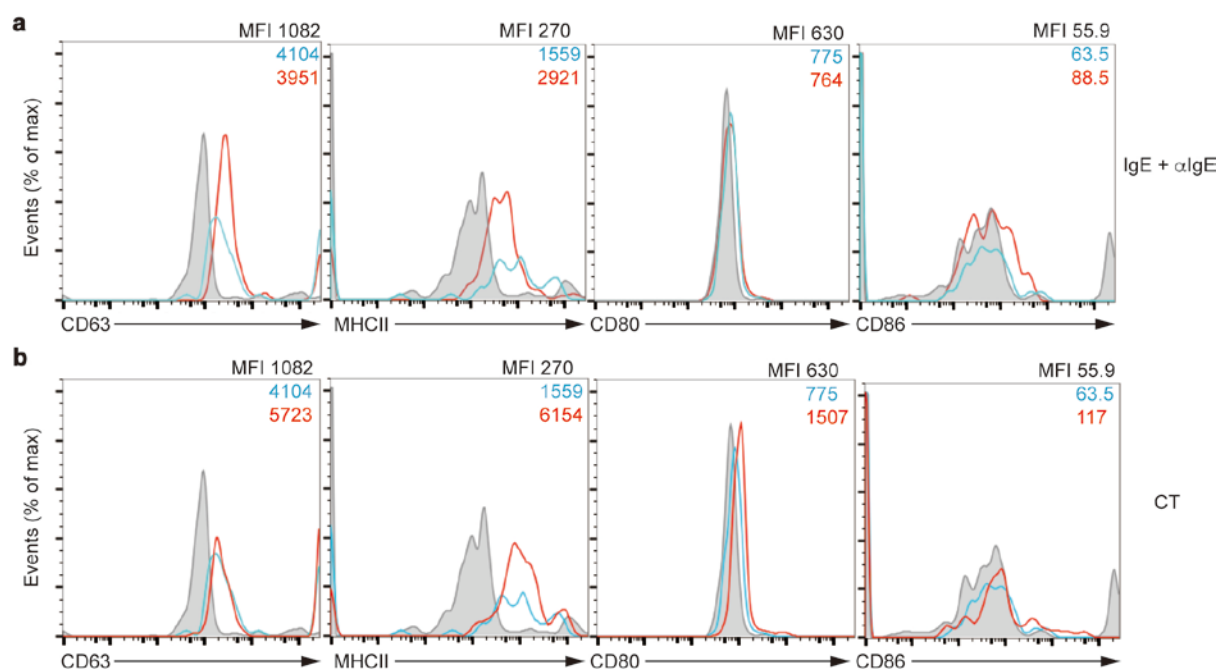

### Supplemental Figure S2. Expression of cell surface markers on SPBs

Flow cytometric analysis of CD63, MHC class II, CD80, and CD86 expression on YFP<sup>+</sup> SPBs were examined after IgE crosslinking (**a**) or incubation with CT (**b**) (red line) or without stimulation (blue line) for 2 hours. Grey bars represent staining with isotype control antibody. Data are representative of three independent experiments.

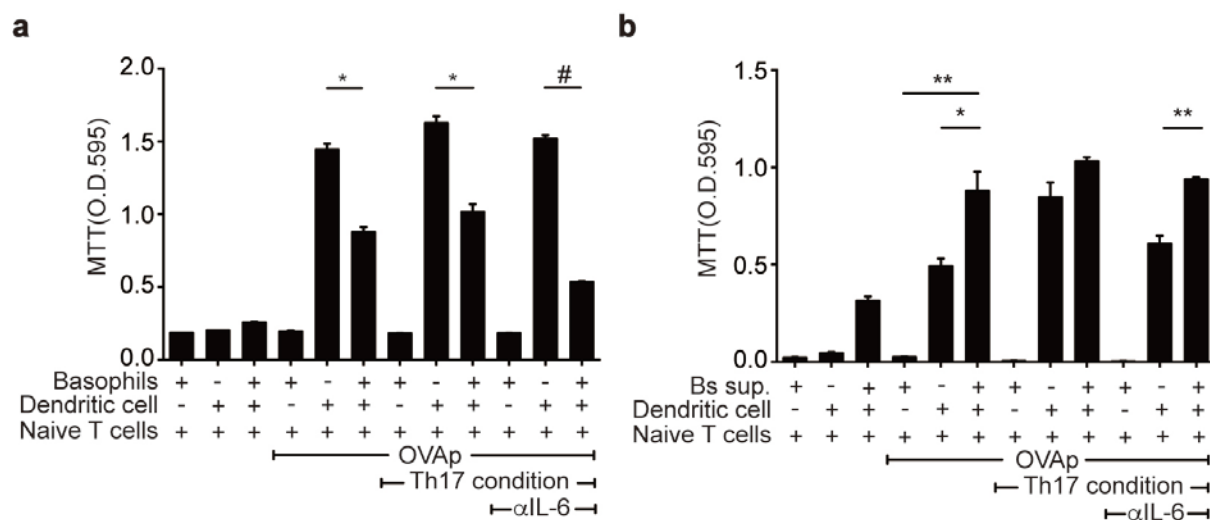

**Supplemental Figure S3. Cooperation of basophils and DCs to drive TH17 cell proliferation**

Proliferation of OT-II CD4 T cells incubated with DCs, basophils, both DCs and basophils (a) or supernatants of activated basophils (b) was assessed with MTT assay as in Figure 4. Data are representative of three independent experiments (n=3) and are presented as mean ± SEM.

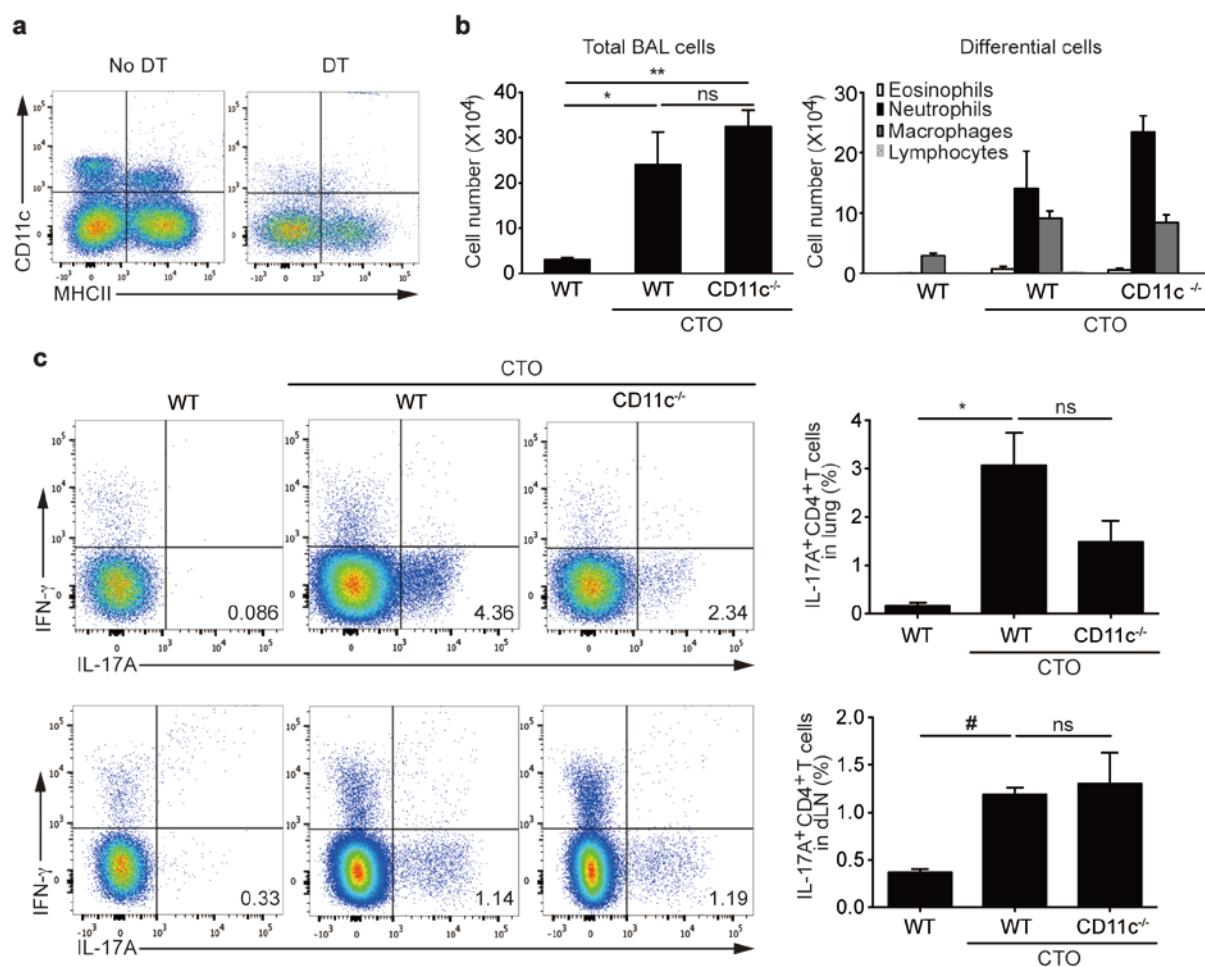

### Supplemental Figure S4. Normal induction of TH17 responses in the absence of CD11c DCs

(a) CD11c<sup>+</sup> DCs were depleted in CD11c-DTR mice by DT treatment. DC depletion was confirmed by FACS analysis. (b) After administration of CTO, the numbers of total cells and inflammatory cells in BAL fluid were calculated in each group. (c) Intracellular cytokine staining of CD4 T cells from lungs and mediastinal LNs of CTO-immunized WT and DC depleted mice were assessed for the production of IL-17A and IFN- $\gamma$ . Data are representative of three independent experiments (n=3) and are presented as mean  $\pm$  SEM.
